# Supplementary material for: Measurement report: Structure of the atmospheric boundary layer and its relationship with the land-atmosphere interaction on the Tibetan Plateau
Source: Copernicus journal article supplement (doi:10.5194/acp-2022-257), 2022-05-10
Supplement: Supplementary file [file acp-2022-257-AC2-supplement.pdf]

We are thankful to the reviewers for their valuable comments on the paper. Below we provide the responses to the comments and questions raised by point to point. Modifications and improvements are incorporated in the revised manuscript as mentioned below for each of the comments. For easy visualization, the responses to the reviewers' comments in bold are provided below

**The authors studied the boundary layer structure in the Tibetan Plateau on the basis of sounding measurements in 2014 and 2019. However, there is nothing new in this manuscript, and only a few sounding profiles were presented. Most literature cited was published twenty years ago, the authors failed to clarify the motivation for the work presented. The authors tried to understand the different influence of the southern branch of the westerly wind and Asian monsoon, while the large-scale synoptic conditions were not presented and analyzed. Also, the authors mentioned the local terrain wind systems (e.g., westerly jet, glacial wind) in the Result section, while no observational evidences were presented.**

**Response,** Thank you very much for your valuable comments

This article is just a measurement report. Its' purpose is to introduce the different characteristics of the atmospheric boundary layer structure under the coordinated action of the westerly and monsoons on the Tibetan Plateau. The experimental design selects 2014 and 2019 accordingly to carry out the observation experiment in the intensive period and analyzes the effect of the ground heating field on the atmospheric boundary combined with the ground flux observation. The influence of the structure of the atmospheric boundary layer in the westerly and monsoon periods can be revealed.

Previous studies have shown that there is glacial wind in the Mount Everest region (Zou, et al., 2007; Sun, et al., 2017; Sun, et al., 2018). In the future, model simulations will be used to further study the impact of the local circulation field on the structure of the atmospheric boundary layer. Similarly, the impact of high-altitude westerly jets can also be studied through model simulations, thereby revealing the changing mechanism of the atmospheric boundary layer structure.

Zou H., Zhou L., Ma S., Li P., Li A., Huo C.: Observation of Diurnal Circulation on the Northern Slope of Mt. Qomolangma, *Plateau Meteorology*, 26(6):1123-1140, 2007

Sun F., Ma Y., Hu Z., et al. Observation of Strong Winds on the Northern Slopes of Mount Everest in Monsoon Season[J]. *Arctic Antarctic & Alpine Research*, 49(4):687-697, doi:10.1657/AAAR0016-010, 2017.

Sun, F., Yao M., et al. Mechanism of Daytime Strong Winds on the Northern Slopes of Himalayas, near Mount Everest: Observation and Simulation[J]. *Journal of Applied Meteorology and Climatology*, 57(2):255-272, 2018.

We have added nearly 20 years of relevant research as follows, and references have been added.

Che, J. and Zhao, P.: Characteristics of the summer atmospheric boundary layer height over the Tibetan Plateau and influential factors, *Atmospheric Chemistry and Physics*, 21, 5253-5268, 10.5194/acp-21-5253-2021, 2021.

Che, J. and Zhao, P.: Characteristics of the summer atmospheric boundary layer height over the Tibetan Plateau and influential factors, *Atmospheric Chemistry and Physics*, 21, 5253-5268, 10.5194/acp-21-5253-2021, 2021.

Chen, X. L., Juan, A. Añel., Su, Z. B., Laura, de. La. Torre., Henñie, Kelder., Jacob, van. Peet., and Ma, Y. M.: The deep atmospheric boundary layer and its significance to the stratosphere and troposphere exchange over the Tibetan Plateau, *PLoS. ONE*, 8, e56909, <https://doi.org/10.1371/journal.pone.0056909>, 2013.

Chen, X. L., Škerlak, B., Rotach, M. W., Juan, A. Anel., Su, Z. B., Ma, Y. M., and Li, M. S.: Reasons for the extremely high-ranging planetary boundary layer over the Western Tibetan Plateau in winter, *J. Atmos. Sci.*, 73, 2021–2038, <https://doi.org/10.1175/jas-d-15-0148.1>, 2016

Davy, R.: The Climatology of the Atmospheric Boundary Layer in Contemporary Global Climate Models, *Journal of Climate*, 31, 9151-9173, 10.1175/jcli-d-17-0498.1, 2018.

Davy, R. and Esau, I.: Differences in the efficacy of climate forcings explained by variations in atmospheric boundary layer depth, *Nat Commun*, 7, 11690, 10.1038/ncomms11690, 2016.

Dirmeyer, P. A., Wang, Z., Mbuh, M. J., and Norton, H. E.: Intensified land surface control on boundary layer growth in a changing climate, *Geophysical Research Letters*, 41, 1290-1294, 10.1002/2013gl058826, 2014.

Guo, J., Miao, Y., Zhang, Y., Liu, H., Li, Z., Zhang, W., He, J., Lou, M., Yan, Y., Bian, L., and Zhai, P.: The climatology of planetary boundary layer height in China derived from radiosonde and reanalysis data, *Atmospheric Chemistry and Physics*, 16, 13309-13319, 10.5194/acp-16-13309-2016, 2016.

Li, N., Zhao, P., Wang, J., and Deng, Y.: The Long-Term Change of Latent Heat Flux over the Western Tibetan Plateau, *Atmosphere*, 11, 10.3390/atmos11030262, 2020.

Shi, Y., Wei, J., Qiao, Z., Zhao, J., and Wang, G.: Atmospheric Exploration of the Qinghai–Tibet Plateau during the East Asian Winter Monsoon (EAWM) from a Ground-Based Microwave Radiometer, *Atmosphere*, 13, 10.3390/atmos13040549, 2022.

Zhang, K., Wu, Y., Wang, F., Li, X., Cui, S., Zhang, Z., Wu, X., Weng, N., Luo, T., and Huang, Y.: Characteristics of the vertical structure of the atmospheric turbulence in the Tibetan Plateau, *Science China Earth Sciences*, 65, 1368-1378, 10.1007/s11430-021-9922-0, 2022.

Zhao, P., Zhou, X., Chen, J., Liu, G., and Nan, S.: Global climate effects of summer Tibetan Plateau, *Science Bulletin*, 64, 1-3, 10.1016/j.scib.2018.11.019, 2019.

Wang, Y., Xu, X., Liu, H., Li, Y., Li, Y., Hu, Z., Gao, X., Ma, Y., Sun, J., Lenschow, D. H., Zhong, S., Zhou, M., Bian, X., and Zhao, P.: Analysis of land surface parameters and turbulence characteristics over the Tibetan Plateau and surrounding region, *Journal of Geophysical Research: Atmospheres*, 121, 9540-9560, 10.1002/2016jd025401, 2016.

Xiang, J., Zhou, J., and Huang, S.: The boundary layer height obtained by the spline numerical differentiation method using COSMIC GPS radio occultation data: A case study of the Qinghai-Tibet Plateau, *Journal of Atmospheric and Solar-Terrestrial Physics*, 215, 10.1016/j.jastp.2020.105535, 2021.
